# Supplementary material for: Diminished apoptosis in hypoxic porcine retina explant cultures through hypothermia
Source: PubMed Central journal article supplement (PMC6427006; doi:10.1038/s41598-019-41113-4), 2019-03-20
Supplement: 41598_2019_41113_MOESM1_ESM.pdf [file 41598_2019_41113_MOESM1_ESM.pdf]

# **Diminished apoptosis in hypoxic porcine retina explant cultures through hypothermia**

Ana M. Maliha<sup>1</sup>, Sandra Kuehn<sup>1</sup>, José Hurst<sup>2</sup>, Fenja Herms<sup>1,3</sup>, Michael Fehr<sup>3</sup>, Karl U. Bartz-Schmidt<sup>2</sup>, H. Burkhard Dick<sup>1</sup>, Stephanie C. Joachim<sup>1#</sup>, Sven Schnichels<sup>2#</sup>

1: Experimental Eye Research Institute, University Eye Hospital, Ruhr-University Bochum, Bochum, Germany

2: University Eye Hospital Tübingen, Centre for Ophthalmology Tübingen, Tübingen, Germany

3: Clinic for Small Animals, University of Veterinary Medicine, Hannover, Germany

**#: equal contributing authors and corresponding authors:**

## **Dr. Sven Schnichels**

University Eye Hospital Tübingen, Centre for Ophthalmology, Elfriede-Aulhorn-Str. 7, 72076 Tübingen, Germany

Phone: +49-7071-2987888, Fax: +49-7071-294935

E-Mail: [sven.schnichels@med.uni-tuebingen.de](mailto:sven.schnichels@med.uni-tuebingen.de)

## **PD Dr. Stephanie C. Joachim**

Experimental Eye Research, University Eye Hospital, Ruhr-University Bochum, In der Schornau 23-25, 44892 Bochum, Germany

Phone: +49-234-299-3156, Fax: +49-234-299-3157

E-Mail: [stephanie.joachim@rub.de](mailto:stephanie.joachim@rub.de)

**Supplementary Figure S1:** Hypothermia protected retinal thickness. **A)** Retinal cross-sections were stained with hematoxylin & eosin to evaluate retinal thickness. **B)** CoCl<sub>2</sub> led to a strong reduction of retinal thickness after four and eight days. Hypothermia prevented the reduction due to CoCl<sub>2</sub>. Hypothermia treated CoCl<sub>2</sub>-stressed retinae had a similar thickness to control retinae. Abbreviations: GCL = ganglion cell layer; IPL = inner plexiform layer; INL = inner nuclear layer; OPL = outer plexiform layer; ONL = outer nuclear layer. n=8-10/group. Statistical differences to control + 37 °C group are marked with \* and differences to CoCl<sub>2</sub> + 37 °C group with #. \*: p<0.05; #, \*\*: p<0.01. Scale bar=20µm.

**Supplementary Figure S2:** Rescue of macroglial response through hypothermia. **A)** mRNA expression of *GFAP* was significantly reduced in both CoCl<sub>2</sub> treated groups compared to the control + 37 °C group at four days as observed in qPCR analyses. After eight days, the *GFAP* expression was not affected in any of the groups compared to the control + 37 °C group. A slightly increased expression was noted between the CoCl<sub>2</sub> + 30 °C and the CoCl<sub>2</sub> + 37 °C group. **B)** Protein levels of GFAP (55 kDa) were normalized against β-III-tubulin (42 kDa) and evaluated via western blot analyses. **C)** Western blot analyses revealed comparable GFAP protein levels in both points in time. **D)** GFAP<sup>+</sup> area was measured in retinal cross-sections. **E)** Treatment with CoCl<sub>2</sub> led to a significantly reduced GFAP<sup>+</sup> area. Hypothermia counteracted the harmful effect of CoCl<sub>2</sub> due to macroglia and normalized the GFAP<sup>+</sup> area in CoCl<sub>2</sub> + 30 °C treated retinae. Abbreviations: GCL = ganglion cell layer; IPL = inner plexiform layer; INL = inner nuclear layer; OPL = outer plexiform layer; ONL = outer nuclear layer. Values are mean±SEM, A: n=6-7/group; C: n=4/group; E: n=10/group. Statistical differences to

control + 37 °C group are marked with \* and differences to CoCl<sub>2</sub> + 37 °C group with #. #, \*: p<0.05; \*\*p<0.01. Scale bar=20µm.

**Supplementary Table 1:** qPCR primer pairs. The listed primer pairs were used in quantitative real-time PCR experiments.

**Supplementary Table 2:** Listed primary and matched secondary antibodies were used for immunohistological analyses.

Supplementary Figure S1:

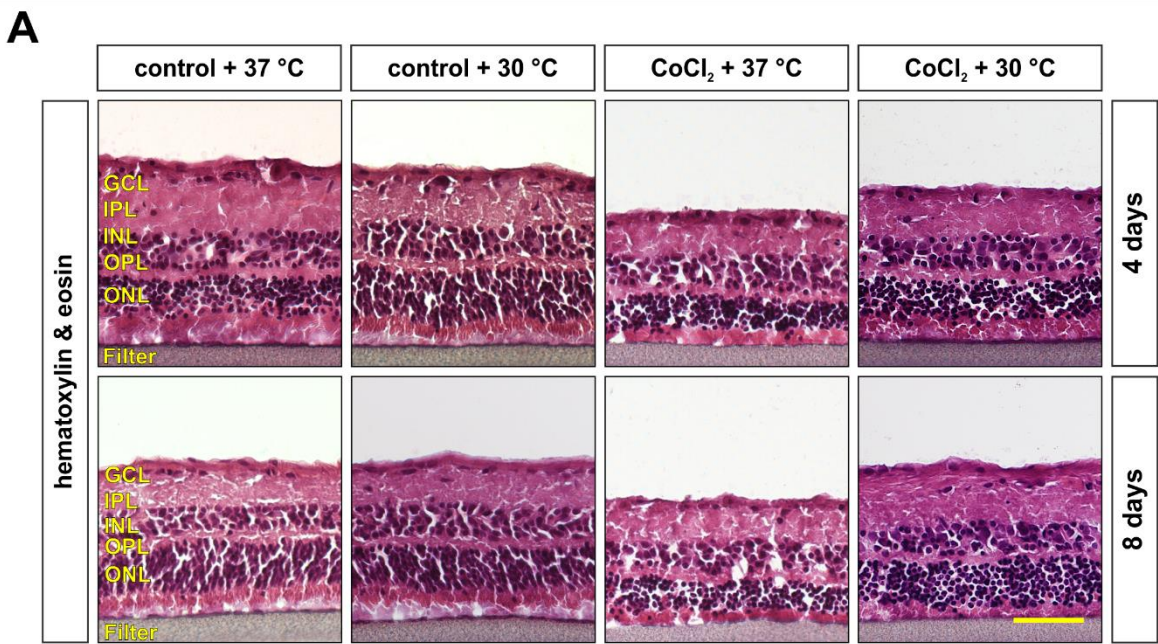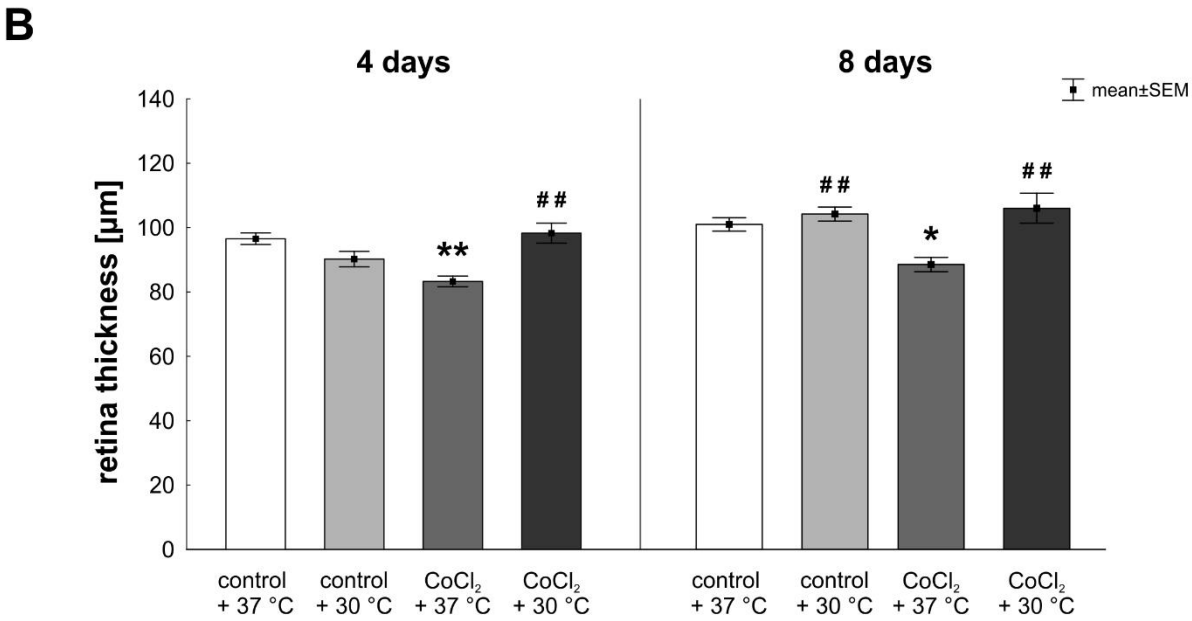

# Supplementary Figure S2:

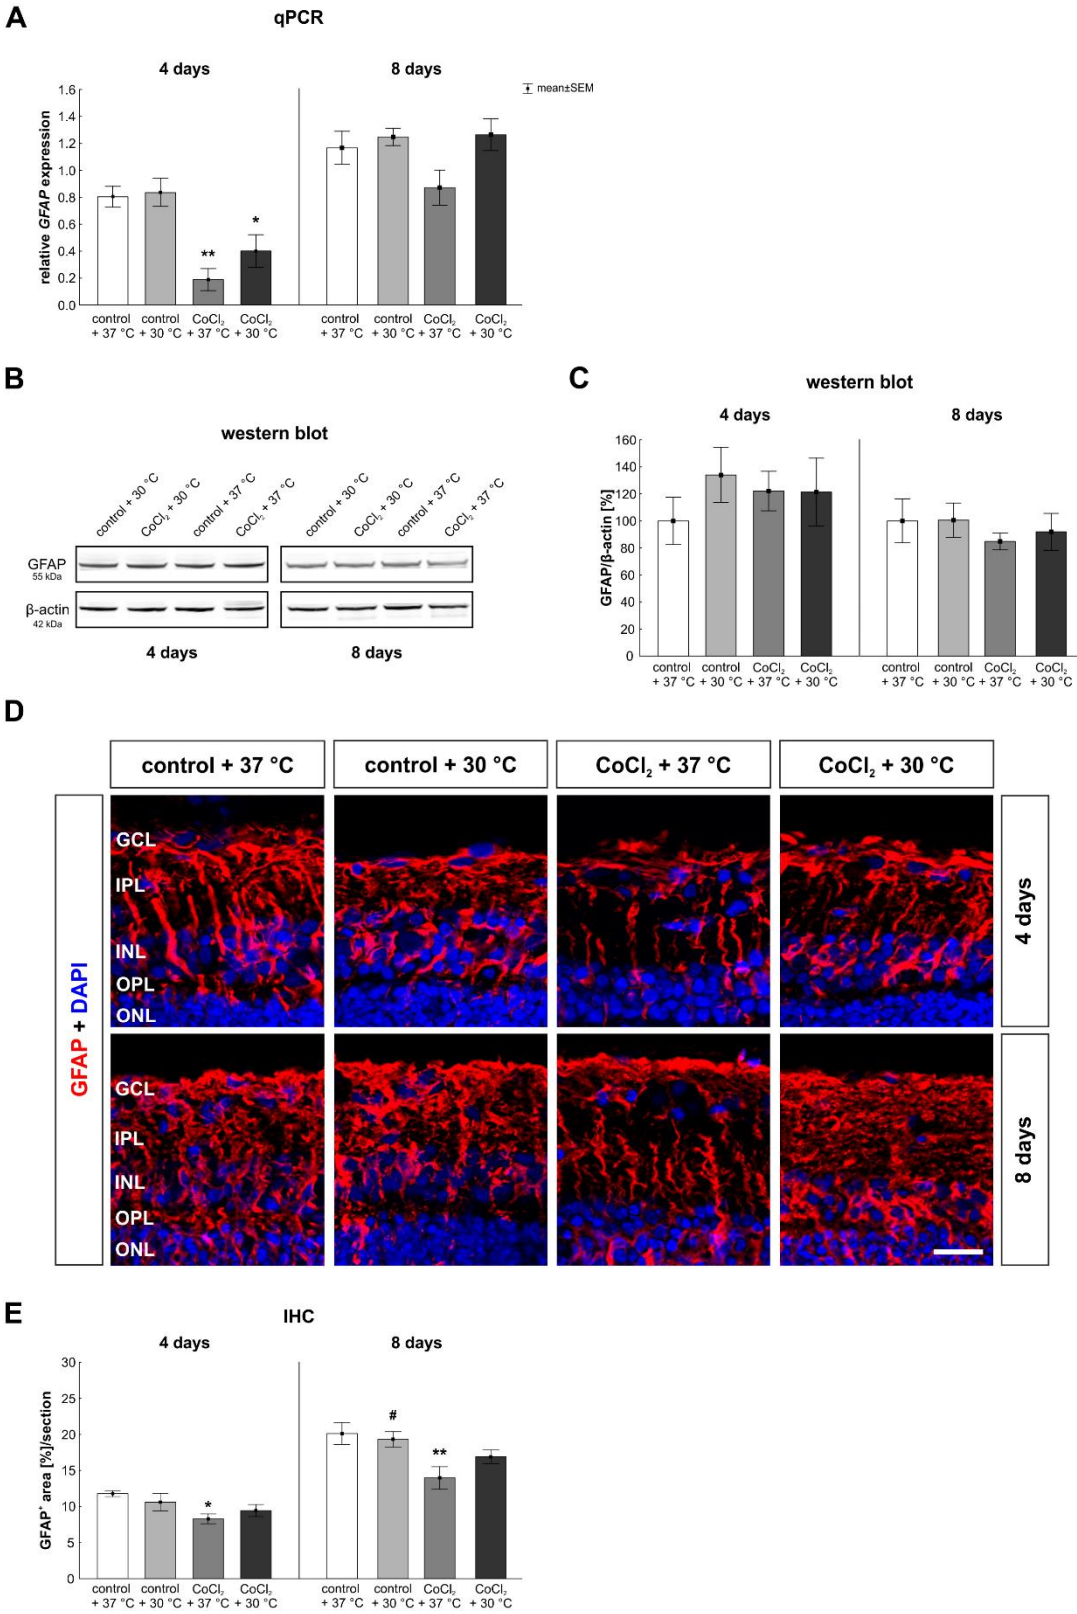

**Supplementary Table 1:**

| <b>Gene</b>      | <b>Oligonucleotide sequence</b>                           |
|------------------|-----------------------------------------------------------|
| <i>Bax</i>       | 5'GGACCATCGGTATTGGTGTC3'<br>3'AGATGAGGGAGAGAGGCACA5'      |
| <i>Bcl-2</i>     | 5'GCTCGTGCGGGATTGACTACTACA3'<br>3'CCAGCGGGTTCTTGCCACAGC5' |
| <i>Calbindin</i> | 5'TGAACCCAAGCTCCAAGAGT3'<br>3'AAAAGGTGAAGATGGCGTTG5'      |
| <i>Caspase 8</i> | 5'GCCCAGATCTCTGCCTACAG3'<br>3'CAGGGCCTTGTTGATTTGTT5'      |
| <i>GFAP</i>      | 5'CAGGATCTGCTCAACGTCAA3'<br>3'ATCTCCACGGTCTTCACCAC5'      |
| <i>Histon H3</i> | 5'ACTGGCTACAAAAGCCGCTC3'<br>3'ACTTGCCTCCTGCAAAGCAC5'      |
| <i>HSP70</i>     | 5'ATGTCCGCTGCAAGAGAAGT3'<br>3'GGCGTCAAACACGGTATTCT5'      |
| <i>PVALB</i>     | 5'CAACGCTGAGGACATCAAGA3'<br>3'TGACAGGTCTCTGGCATCTG5'      |
| <i>TUBB3</i>     | 5'CAGATGTTTCGATGCCAAGAA3'<br>3'GGGATCCACTCCACGAAGTA5'     |
| <i>β-actin</i>   | 5'CTCTTCCAGCCTTCCTTC3'<br>3'GGGCAGTGATCTCTTTCT5'          |
| <i>CD11b</i>     | 5'AGAAGGAGACACCCAGAGCA3'<br>3'GTAGGACAATGGGCGTCACT5'      |
| <i>iNOS</i>      | 5'TGTTTCAGCTGTGCCTTCAAC3'<br>3'CAGAACTGGGGGTACATGCT5'     |
| <i>p21</i>       | 5'GACCCTCAGAAGAGCCACAG3'<br>3'GTCGAAGTTCCATCGCTCTC5'      |
| <i>Calbindin</i> | 5'TGAACCCAAGCTCCAAGAGT3'<br>3'AAAAGGTGAAGATGGCGTTG5'      |
| <i>HIF1α</i>     | 5'TTACAGCAGCCAGATGATCG3'<br>3'TGGTCAGCTGTGGTAATCCA5'      |

**Supplementary Table 2:**

|                      | Primary antibodies            |                |            |                                  | Secondary antibodies                         |                         |             |          |
|----------------------|-------------------------------|----------------|------------|----------------------------------|----------------------------------------------|-------------------------|-------------|----------|
|                      | Antibody                      | Company        | Catalogue# | Dilution                         | Antibody                                     | Company                 | Catalogue#  | Dilution |
| <b>IHC</b>           | Anti-Brn-3a                   | Santa Cruz     | SC-31984   | 1:100                            | Donkey anti-goat<br>Alexa Fluor 488          | Dianova                 | 705-545-147 | 1:500    |
|                      | Anti-calretinin               | Millipore      | AB1550     | 1:2000                           |                                              |                         |             |          |
|                      | Anti-Chx10                    | Santa Cruz     | SC-21692   | 1:300                            |                                              |                         |             |          |
|                      | Anti-cleaved caspase 3        | Sigma-Aldrich  | C8487      | 1:300                            | Donkey anti-rabbit<br>Alexa Fluor 555        | Jackson Immuno-Research | 711-547-003 | 1:500    |
|                      | Anti-Fc $\gamma$ -R (CD16/32) | BD Bioscience  | 14-0161    | 1:100                            | Donkey anti-rat<br>Alexa Fluor 488           | Thermo Fischer          | A-21208     | 1:400    |
|                      | Anti-GFAP                     | Millipore      | AB5541     | 1:3000                           | Donkey anti-chicken<br>Cy3                   | Millipore               | AP194C      | 1:500    |
|                      | Anti-HIF-1 $\alpha$           | BD Bioscience  | 610959     | 1:100                            | Donkey anti-mouse<br>Alexa Fluor 555         | Abcam                   | AB150106    | 1:500    |
|                      | Anti-Iba1                     | WAKO           | 019-19741  | 1:400                            | Donkey anti-rabbit<br>Alexa Fluor 555        | Jackson Immuno-Research | 711-547-003 | 1:500    |
|                      | Anti-NeuN                     | Millipore      | ABN91      | 1:400                            | Donkey anti-chicken<br>Alexa Fluor 488       | Jackson Immuno-Research | 703-545-155 | 1:500    |
|                      | Anti-PKC $\alpha$             | Santa Cruz     | SC-8393    | 1:300                            | Donkey anti-mouse<br>Alexa Fluor 555         | Abcam                   | AB150106    | 1:500    |
| <b>WB</b>            | Anti-GFAP                     | Millipore      | AB5541     | 1:3000                           | IRDye donkey anti-chicken<br>Alexa Fluor 680 | LI-COR                  | 925-68075   | 1:20000  |
|                      | Anti-HSP70                    | Santa Cruz     | SC-24      | 1:200                            | Donkey anti-mouse<br>Alexa Fluor 680         | Invitrogen              | A10038      | 1:5000   |
|                      | Anti- $\beta$ -III-tubulin    | R&D Systems    | MAB1195    | 1:10000                          |                                              |                         |             |          |
|                      | Anti- $\beta$ -actin          | Cell Signaling | 4970S      | 1:5000                           | IRDye donkey anti-rabbit<br>DL800            | Thermo Fischer          | SA5-10044   | 1:20000  |
| Anti- $\beta$ -actin | Sigma-Aldrich                 | S2228          | 1:6000     | IRDye donkey anti-mouse<br>DL800 | LI-COR                                       | 926-32212               | 1:20000     |          |

## **Supplementary text**

### **Methods**

#### **Measurement of reactive oxygen species (ROS)-level**

On day one, right before CoCl<sub>2</sub>-treatment, part of the filter inserts with the retinae were cut out, placed in a 12-well plate and cultivated in 500 µl media containing 300 µM CoCl<sub>2</sub>. The next day, 18 h after CoCl<sub>2</sub>-treatment started, H<sub>2</sub>O<sub>2</sub> substrate was added to the medium and placed in the incubator for another 6 h. Then, 50 µl of a ROS-GLO™ Detection Solution was added to a 96-well plate (Greiner). To detect ROS in cultured retinae, 50 µl media of each retinae was added to the 96-well plate and incubated for 20 minutes at room temperature. ROS-level was measured with GloMax® 96 Microplate Luminometer (Promega) with an exposure time of 0.5 seconds. For the measurement 48 hours after CoCl<sub>2</sub>-induction, the same protocol was performed on day three of the cultivation.

#### **Histological analyses of retinal cells**

For GFAP measurement, all images were cropped (600x700 pixel). Next, images were transformed into grayscale and for each image, a suitable upper and lower threshold was evaluated. The mean value of all upper and lower thresholds was calculated for the respective point in time and used for the final analyses (4 days: lower threshold: 10.42; upper threshold: 84.41; 8 days: lower threshold: 13.95; upper threshold: 85.05).
